# Supplementary material for: The microwave-assisted synthesis of silica nanoparticles and their applications in a soy plant culture
Source: Royal Society of Chemistry journal article supplement (doi:10.1039/d3ra05648a), 2023-01-01
Supplement: d3ra05648a1.pdf [file d3ra05648a1.pdf]

1 **Microwave-assisted synthesis of silica nanoparticles and their applications in a soy**  
2 **plant culture**

3 Daniel Carneiro Freitas, Italo Odone Mazali, Fernando Aparecido Sigoli, Danielle da  
4 Silva Francischini and Marco Aurélio Zezzi Arruda

5

6

**Supplementary material**

7

8

**FIGURE SM1**

9

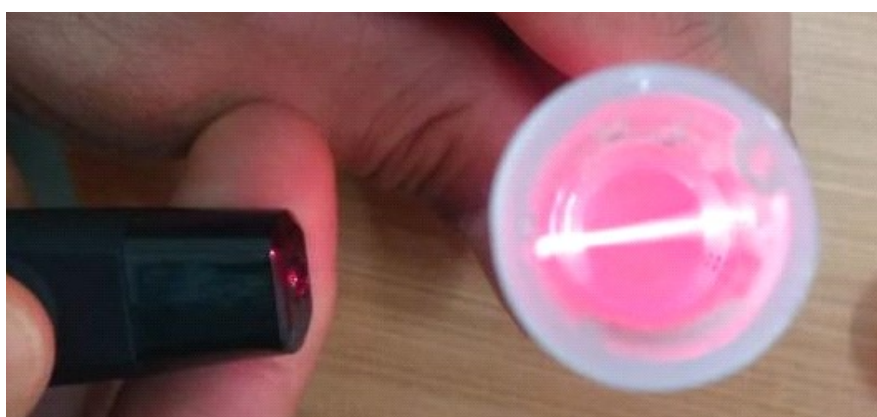

10

11 The Tyndall effect in the sample after the synthesis of SiO<sub>2</sub>-NPs by microwave

12

13

14

## Figure SM2

15

### System

Temperature (°C): 25,0                      Duration Used (s): 60  
Count Rate (kcps): 303,0                  Measurement Position (mm): 5,50  
Cell Description: Clear disposable zeta cell      Attenuator: 6

### Results

|                                | Size (d.n...         | % Intensity: | St Dev (d.n... |
|--------------------------------|----------------------|--------------|----------------|
| <b>Z-Average (d.nm):</b> 86,22 | <b>Peak 1:</b> 112,2 | 100,0        | 57,64          |
| <b>Pdl:</b> 0,218              | <b>Peak 2:</b> 0,000 | 0,0          | 0,000          |
| <b>Intercept:</b> 0,956        | <b>Peak 3:</b> 0,000 | 0,0          | 0,000          |

**Result quality** Good

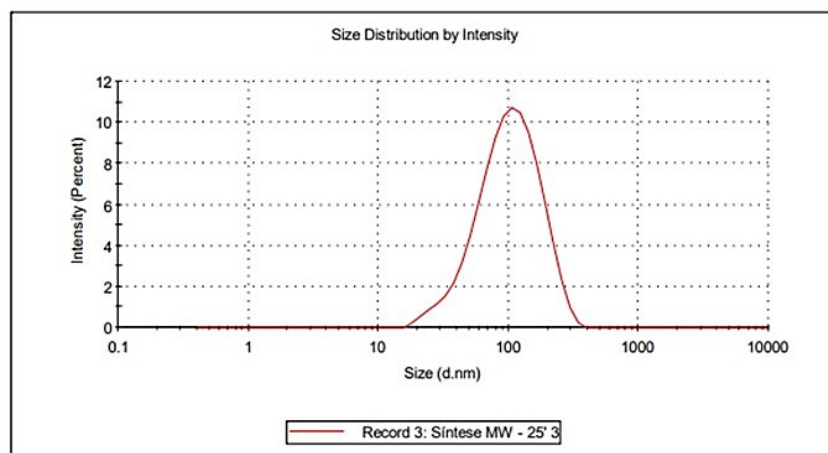

16

17 DLS analysis showing clusters formation with microwave time of 25 min. in step 2. (see  
18 Table 1)
